# Supplementary material for: Genomic differentiation and intercontinental population structure of mosquito vectors Culex pipiens pipiens and Culex pipiens molestus
Source: PubMed Central journal article supplement (PMC7200692; doi:10.1038/s41598-020-63305-z), 2020-05-05
Supplement: 41598_2020_63305_MOESM1_ESM.pdf [file 41598_2020_63305_MOESM1_ESM.pdf]

**Genomic differentiation and intercontinental population structure of mosquito vectors  
*Culex pipiens pipiens* and *Culex pipiens molestus***

Andrey A. Yurchenko, Reem A. Masri, Natalia V. Khrabrova, Anuarbek K. Sibataev, Megan L. Fritz, and Maria V. Sharakhova

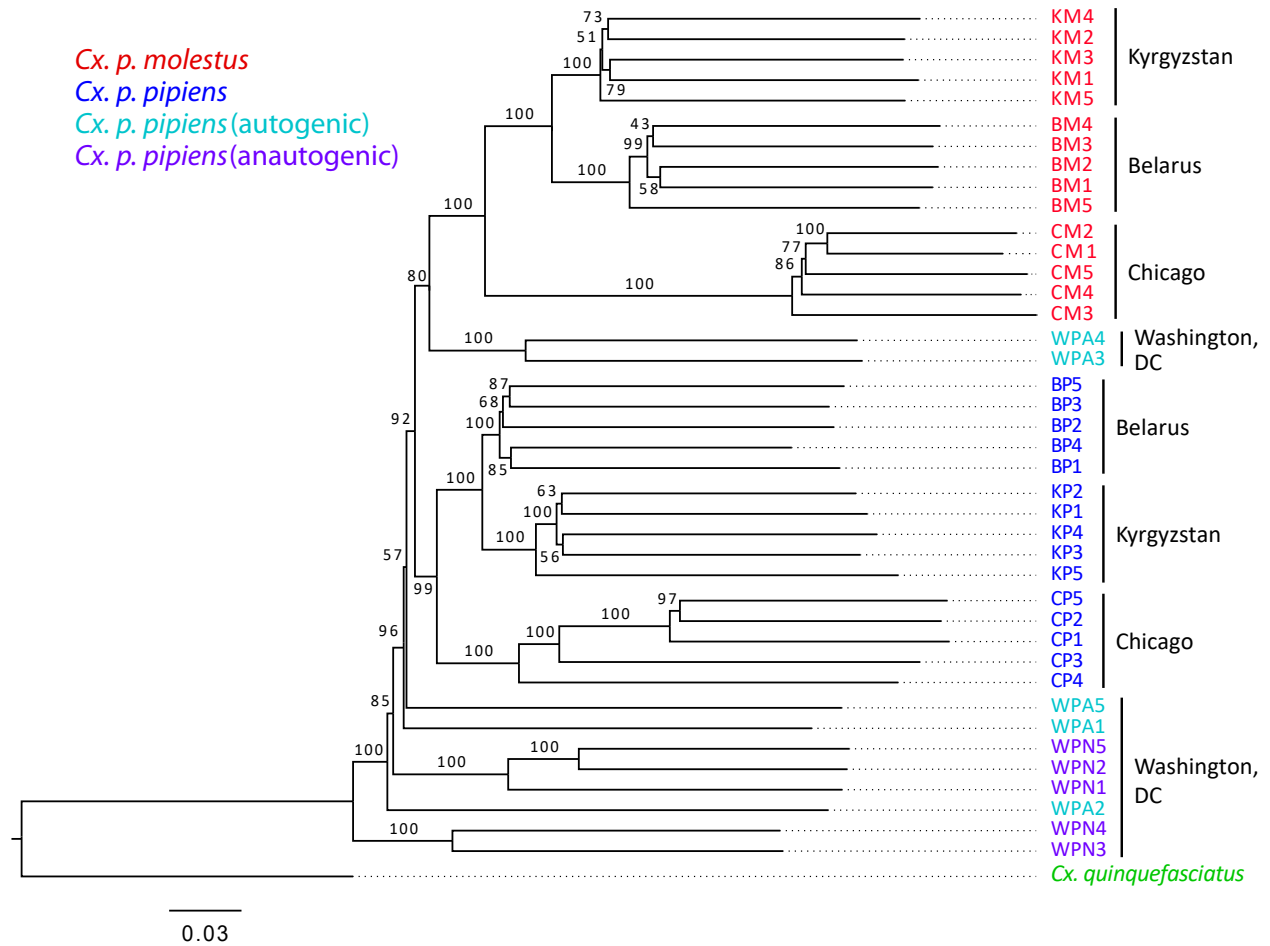

**Supplementary Fig. 1.** Neighbour-Joining tree constructed with nuclear dataset.

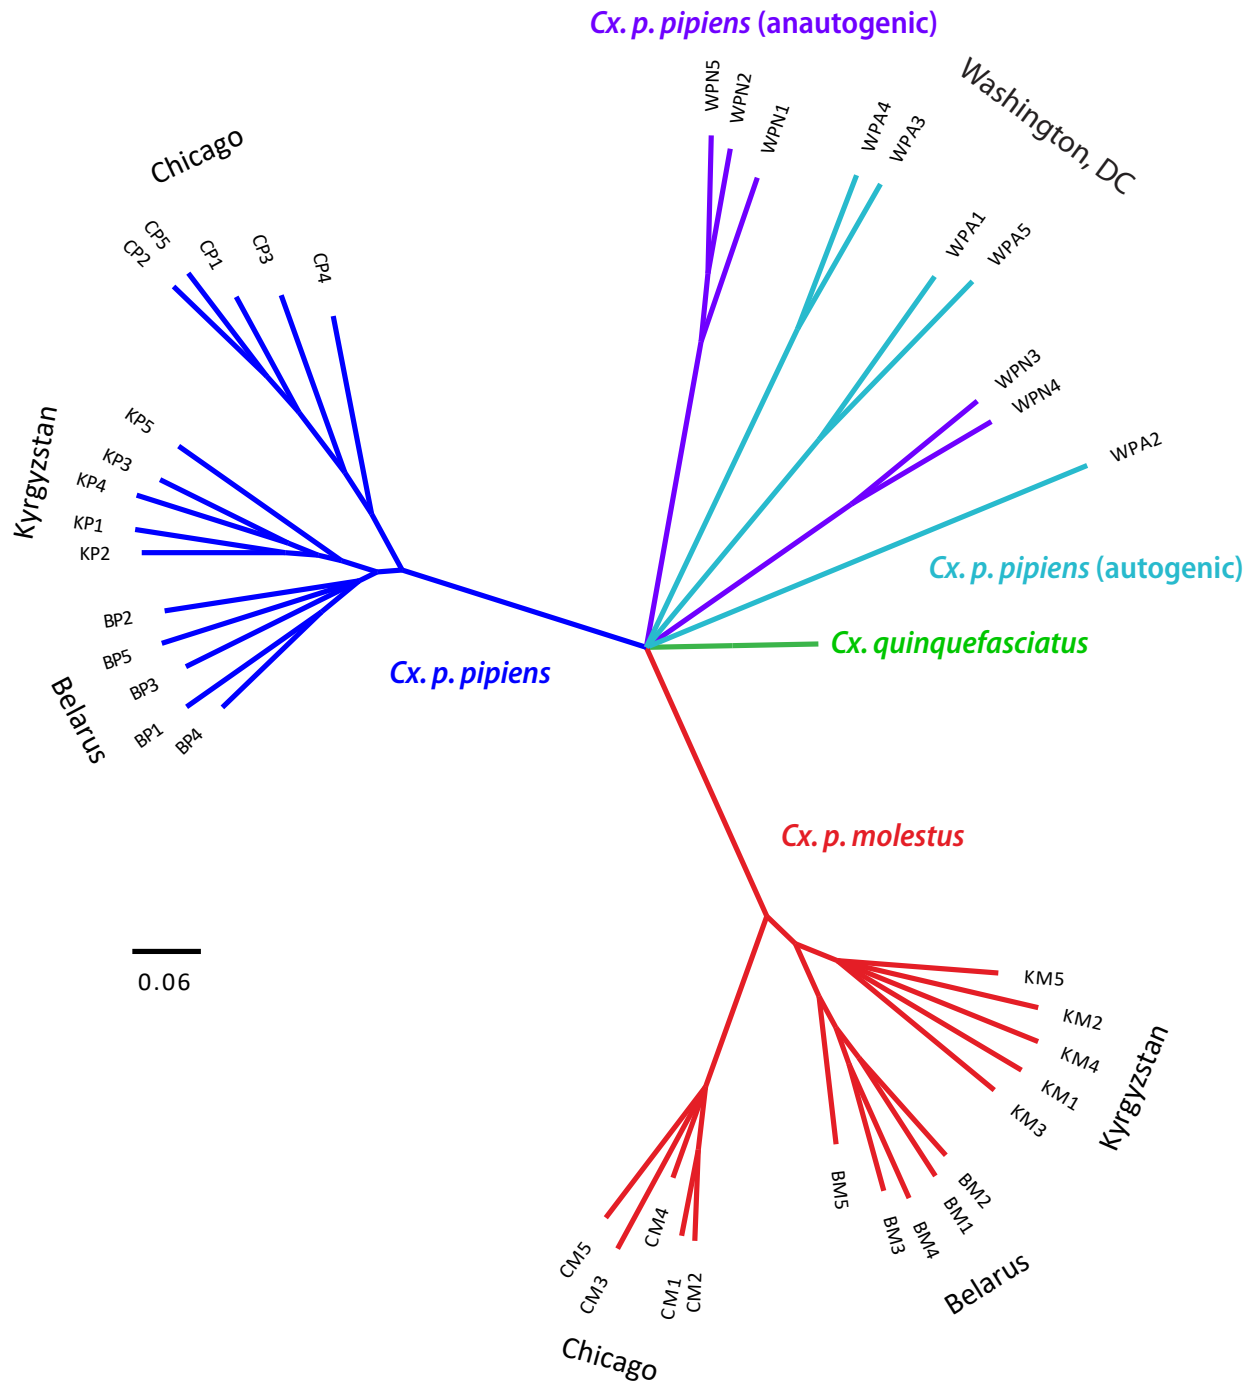

**Supplementary Fig. 2.** Maximum-Likelihood rooted tree constructed with nuclear dataset. All the nodes with bootstrap values lower 90% are collapsed.

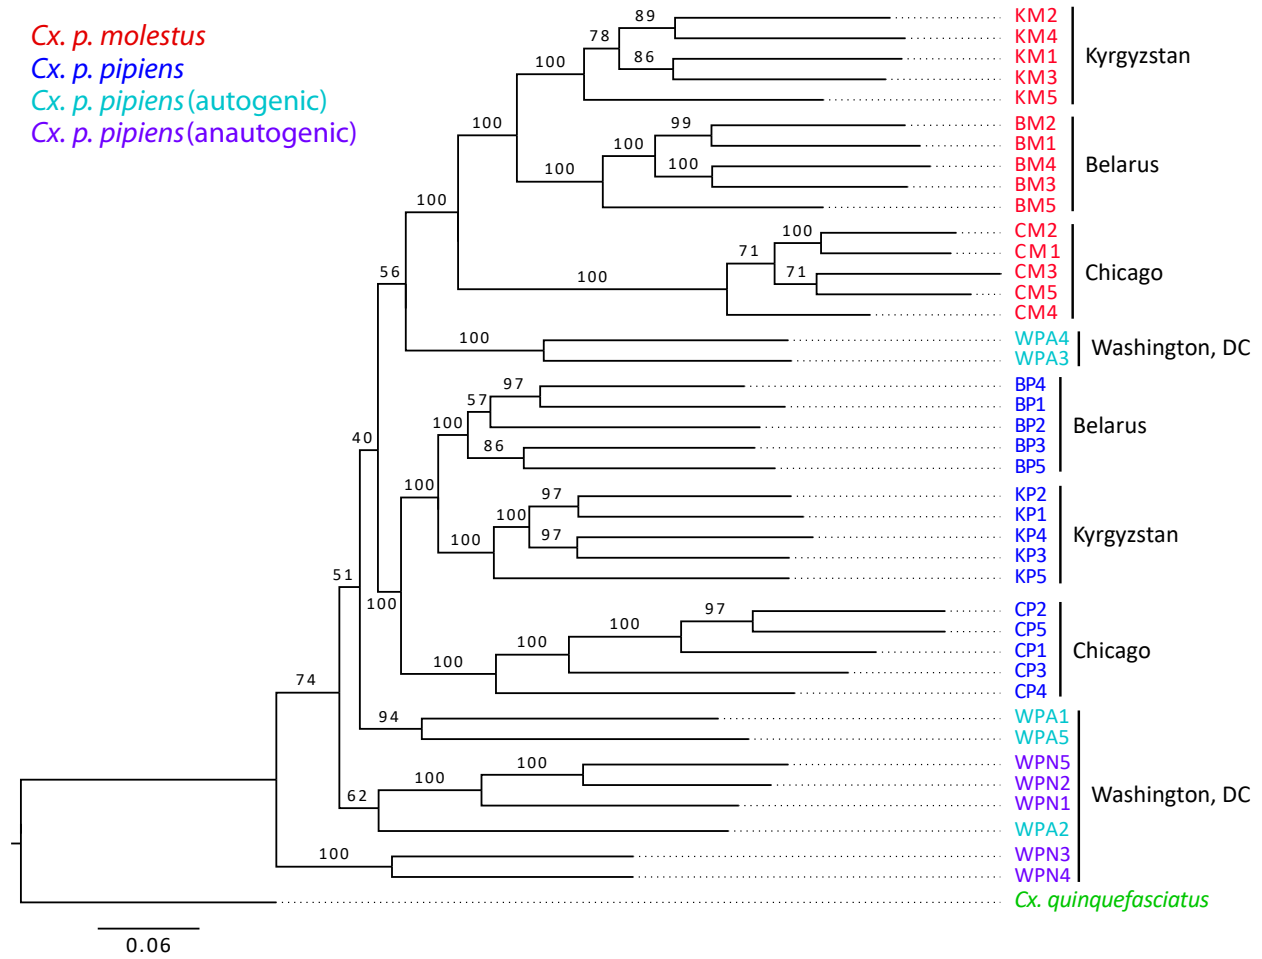

**Supplementary Fig. 3.** Maximum-Likelihood rooted tree constructed with nuclear dataset and rooted to *Cx. quinquefasciatus*.

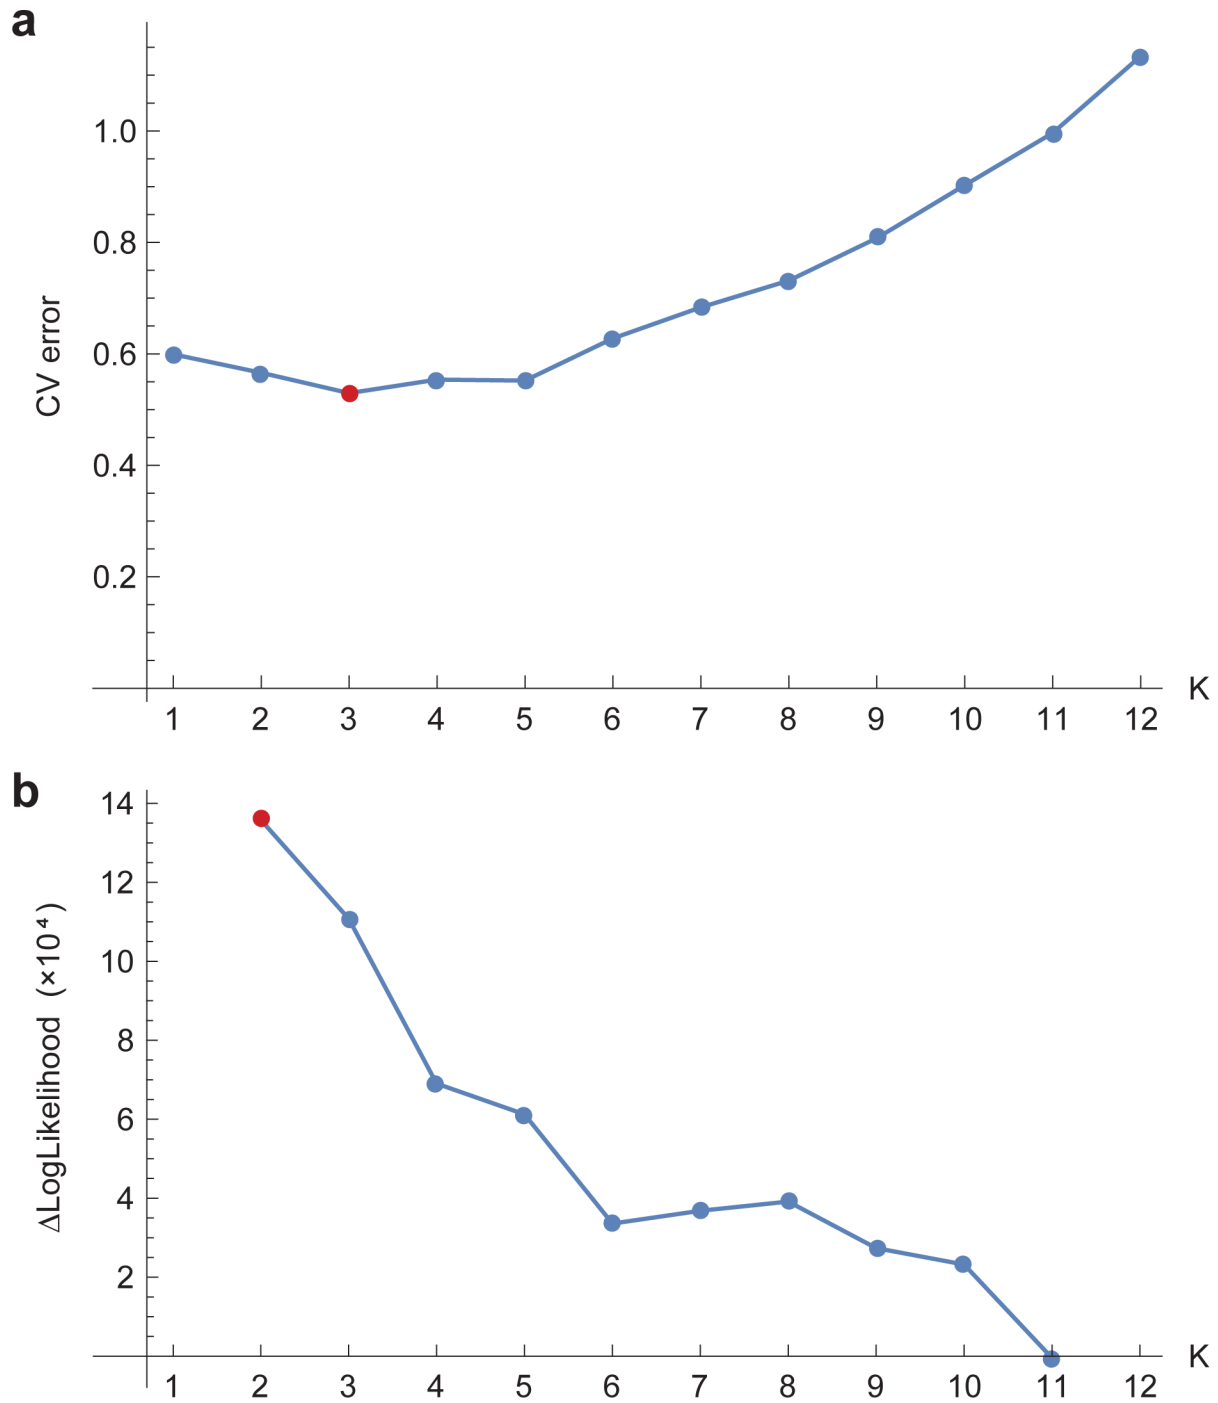

**Supplementary Fig. 4.** ADMIXTURE Cross-Validation error (A) and  $\Delta$  Loglikelihood (B) point out to K=2-3 as the optimal number of genetic clusters.

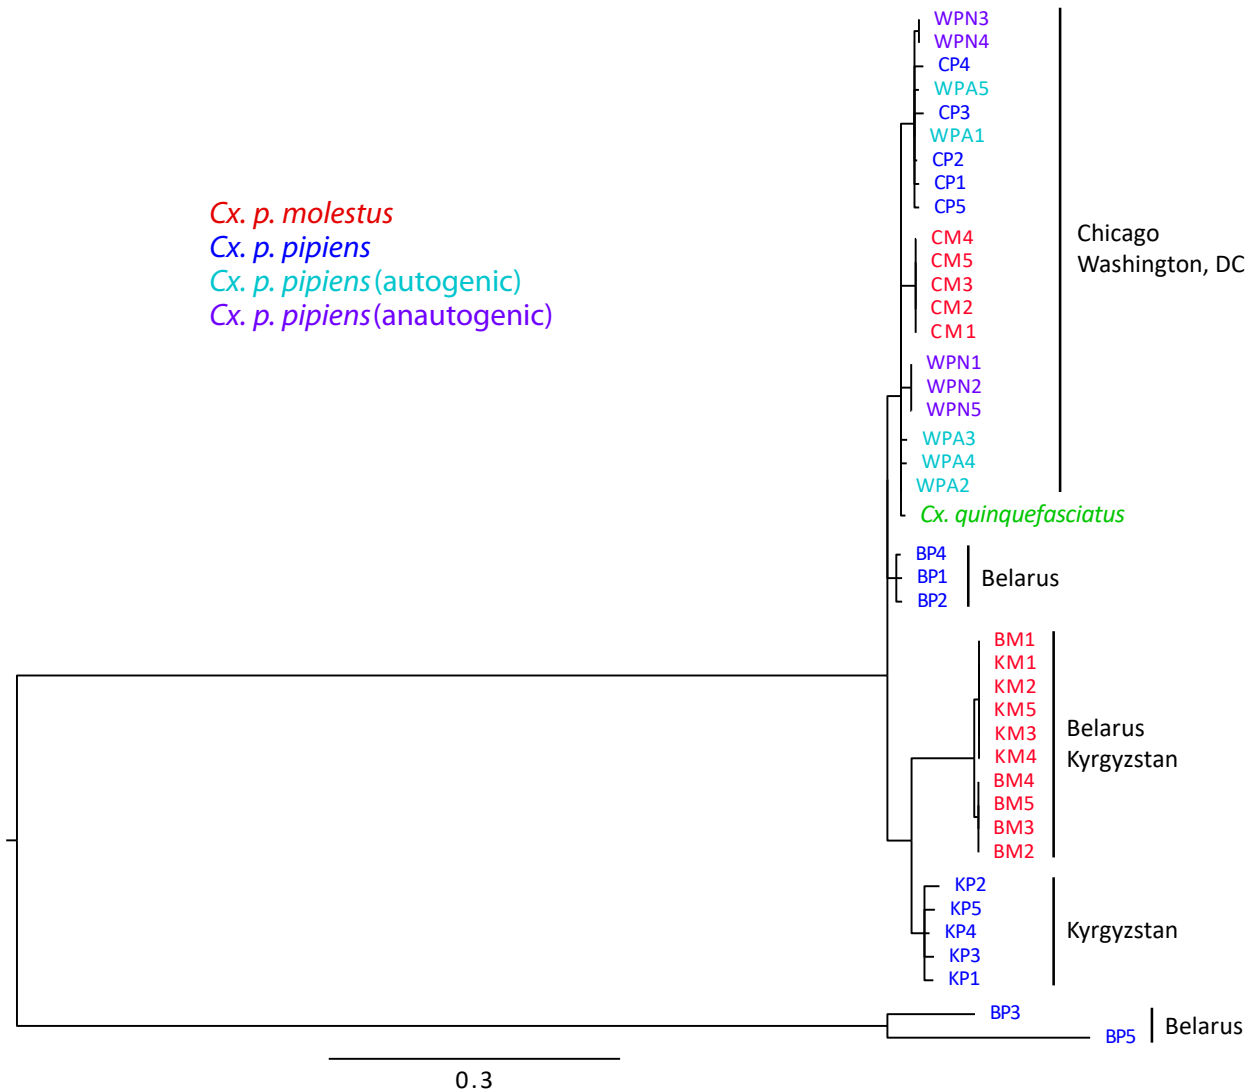

**Supplementary Fig. 5.** Maximum-Likelihood rooted tree constructed with mitochondrial dataset. All the nodes with bootstrap values lower 70% are collapsed.
